# Supplementary material for: Diverse Genetic Conflicts Mediated by Molecular Mimicry and Computational Approaches to Detect Them
Source: Preprints.org preprint supplement (doi:10.20944/preprints202403.1765.v1), 2024-03-28
Supplement: Supplementary file 1 [file supplementary]

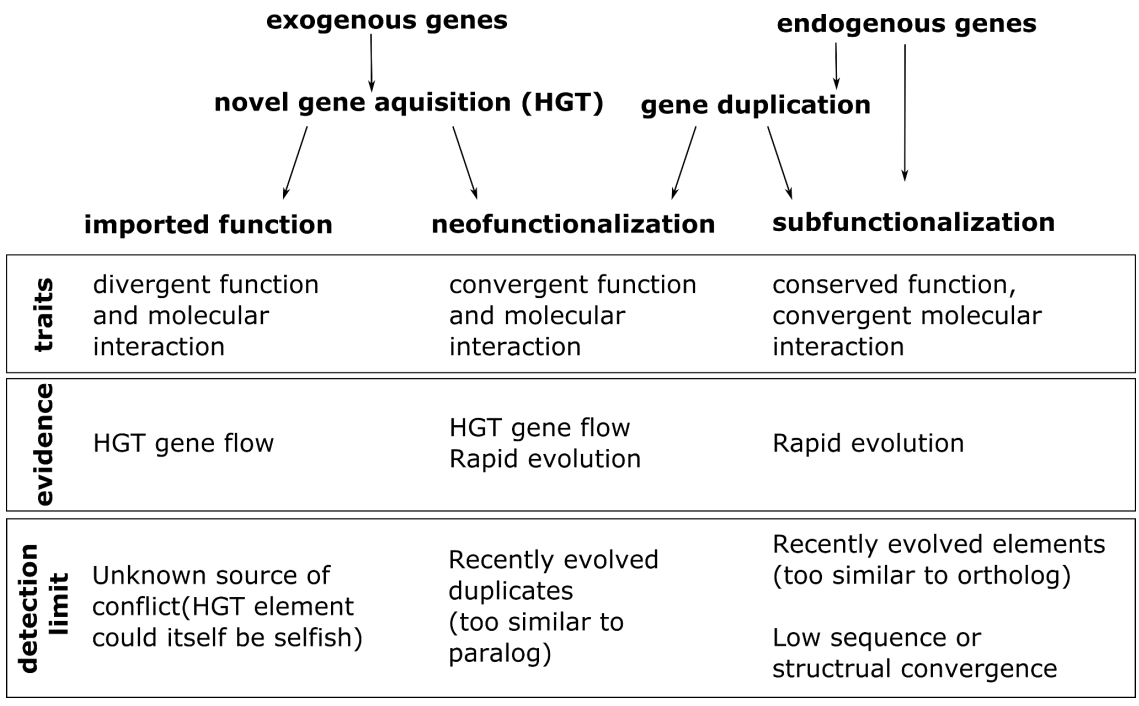

**Figure S1.** Summary of the evolutionary sources of selfish molecular mimicry discussed in the text.

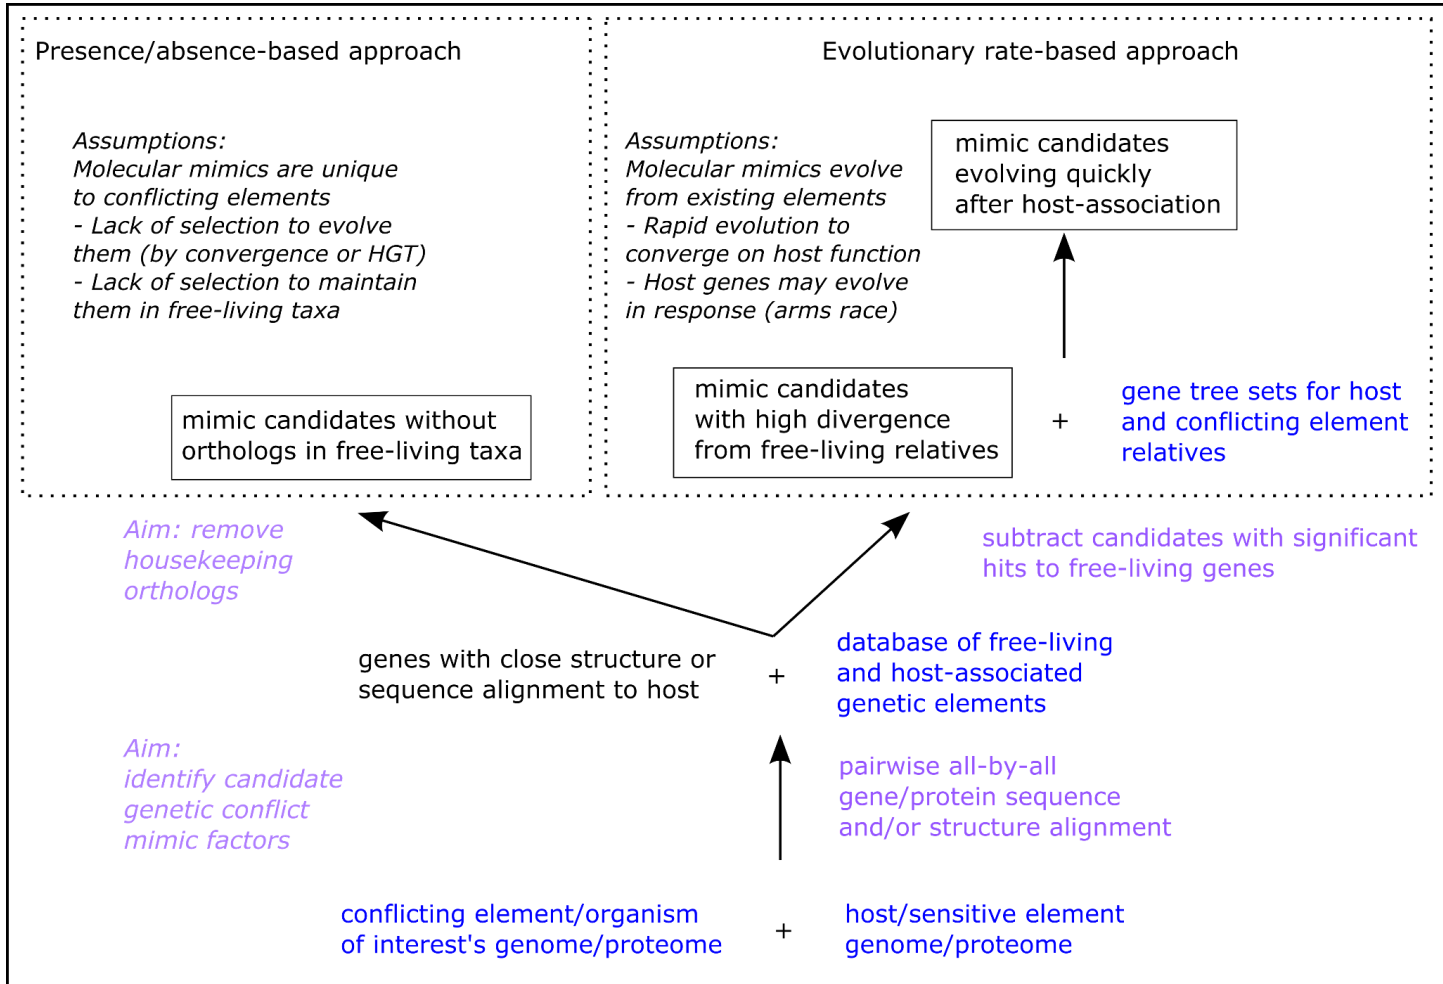

**Figure S2.** Molecular mimic computational screen guidelines for finding novel and fast-evolving candidate loci in genetic conflicts.

reference

[1] S. Xiao, Y. Wang, S. Shan, Z. Zhou, The interplay between viral molecular mimicry and host chromatin dynamics, *Nucleus* 14 (2023) 2216560. <https://doi.org/10.1080/19491034.2023.2216560>.

[2] D. Rothschald-Rodriguez, M. Hedges, M. Kaplan, S. Karav, F.L. Nobrega, Phage-encoded carbohydrate-interacting proteins in the human gut, *Frontiers in Microbiology* 13 (2023). <https://www.frontiersin.org/articles/10.3389/fmicb.2022.1083208> (accessed October 30, 2023).

[3] E. G. Norris, K.S. Pan, D.C. Hocking, Receptor-binding domain of SARS-CoV-2 is a functional *ov*-integrin agonist, *Journal of Biological Chemistry* 299 (2023). <https://doi.org/10.1016/j.jbc.2023.102922>.

[4] V. Muthyia, J.D. Wasmuth, Proteome-wide comparison of tertiary protein structures reveals molecular mimicry in Plasmodium-Human interactions, *Frontiers in Parasitology* 2 (2023). <https://www.frontiersin.org/articles/10.3389/fpara.2023.1162697> (accessed October 21, 2023).

[5] M.M. Mestrali, A. Alzaman, H.A. Alturki, S. Alshahrani, H.H. Almusawi, Z. Basharat, Molecular Mimicry Mapping in Streptococcus pneumoniae: Clues for Autoimmune Disorders and Implications for Immune Defense Activation, *Pathogens* 12 (2023) 857. <https://doi.org/10.3390/pathogens12070857>.

[6] Y.C. Martins, A.D. Jurberg, C.T. Danel-Ribeiro, *Vasting Molecular Mimicry* Over More: Pathogenicity, Virulence, and Autoimmunity, *Microorganisms* 11 (2023) 1472. <https://doi.org/10.3390/microorganisms11061472>.

[7] H.S. Malik, J.E. Manik, Editorial overview: Conflicts, conflicts everywhere, *Current Opinion in Genetics & Development* 83 (2023) 102131. <https://doi.org/10.1016/j.cogd.2023.102131>.

[8] C.-H. Ma, D. Kumar, M. Jayaram, S.K. Ghosh, V.R. Iyer, The selfish yeast plasmid exploits a SWI/SNF-type chromatin remodeling complex for hitchhiking on chromosomes and ensuring high-fidelity propagation, *PLOS Genetics* 19 (2023) e1010986. <https://doi.org/10.1371/journal.pgen.1010986>.

[9] S. Li, H.G. Dohman, Evolutionary conservation of sequence motifs at sites of protein modification, *Journal of Biological Chemistry* 299 (2023). <https://doi.org/10.1016/j.jbc.2023.104617>.

[10] S. Goswami, D. Samanta, K. Duravellan, Molecular mimicry of host short linear motif-mediated interactions utilised by viruses for entry, *Mol Biol Rep* 50 (2023) 4665–4673. <https://doi.org/10.1007/s11033-023-08389-2>.

[11] T.G. Franklin, P.S. Brzovic, J.N. Pruneda, Bacterial mimicry of eukaryotic HECT ubiquitin ligation, (2023) 2023.06.05.543783. <https://doi.org/10.1101/2023.06.05.543783>.

[12] J. English, S. Patrick, L.D. Stewart, The potential role of molecular mimicry by the anaerobic microbiota in the aetiology of autoimmune disease, *Anaerobe* 80 (2023) 102721. <https://doi.org/10.1016/j.anaerobe.2023.102721>.

[13] K. Cermakova, H.C. Hodges, Interaction modules that impart specificity to disordered protein, *Trends in Biochemical Sciences* 48 (2023) 477–490. <https://doi.org/10.1016/j.tibs.2023.01.004>.

[14] B. Benube, E. Ernst, J. Cahn, B. Roche, C. de S. Alves, J. Lynn, A. Scheban, A. Siepel, J. Ross-Ibarra, J. Kermicle, R. Martienssen, Teosinte Pollen Drive guides maize domestication and evolution by RNAi, (2023) 2023.07.12.548689. <https://doi.org/10.1101/2023.07.12.548689>.

[15] C.A. Balbin, J. Nunez-Castilla, V. Stebliankin, P. Baral, M. Sobhan, T. Cickovski, A.M. Mondal, G. Narasimhan, P. Chagapain, K. Mathee, J. Silberg-Liberles, Epitope: identifying molecular mimicry between pathogens and known immune epitopes, (2023) 100023. <https://doi.org/10.1016/j.immuno.2023.100023>.

[16] H. Anbo, K. Sakuma, S. Fukuchi, M. Ota, How AlphaFold2 Predicts Conditionally Folding Regions Annotated in an Intrinsically Disordered Protein Database, *IDEAL, Biology* 12 (2023) 182. <https://doi.org/10.3390/biology12020182>.

[17] J.D. Allen, D.P. Ivory, S.G. Song, W. He, T. Capozzola, P. Yong, D.R. Burton, R. Andradóttir, M. Crispin, The diversity of the glycan shield of sarbecoviruses related to SARS-CoV-2, *Cell Reports* 42 (2023). <https://doi.org/10.1016/j.celrep.2022.112307>.

[18] C. J. Wilson, W.-Y. Choy, M. Kartunus, AlphaFold2: A Role for Disordered Protein/Region Prediction?, *International Journal of Molecular Sciences* 23 (2022) 4591. <https://doi.org/10.3390/ijms23094591>.

[19] C. Wang, H. Wang, In Silico Approach Gives Insights into Ig-like Fold Containing Proteins in *Vibrio parahaemolyticus*: A Focus on the Fibritin Adhesin, *Toxins* 14 (2022) 133. <https://doi.org/10.3390/toxins14020133>.

[20] M. Vihinen, Individual Genetic Heterogeneity, *Genes* 13 (2022) 1626. <https://doi.org/10.3390/genes13091626>.

[21] K.R. Vann, A. Acharya, S.M. Jiang, C. Lachance, M. Zandian, T.A. Holt, A.L. Smith, K. Pandey, D.L. Durden, D. El-Garnal, J. Côté, S.H. Byradydd, T.G. Kutaladze, Binding of the SARS-CoV-2 envelope E protein to human BRD4 is essential for infection, *Structure* 30 (2022) 1224-1232.e5. <https://doi.org/10.1016/j.str.2022.05.020>.

[22] S. Tati, L. Altisarac, Recruitment of dynein and kinesin to viral particles, *The FASEB Journal* 36 (2022) e23211. <https://doi.org/10.1096/fj.202109000R>.

[23] B.L. Spillings, C.J. Day, A. Garcia-Membreras, A. Aggarwal, N.D. Condon, T. Haseilhorst, D.F.J. Purcell, S.G. Turville, J.L. Stow, M.P. Jennings, J. Mak, Host glycolytic captures HIV proximal to the cell surface via oligomannose-GlcNAc glycan-glycan interactions to support viral entry, *Cell Reports* 38 (2022). <https://doi.org/10.1016/j.celrep.2022.110296>.

[24] D. Seo, D.B. Gammon, Manipulation of Host Microtubule Networks by Viral Microtubule-Associated Proteins, *Viruses* 14 (2022) 979. <https://doi.org/10.3390/v14050979>.

[25] L. Ren, D. Shen, C. Liu, Y. Ding, Protein Tyrosine and Serine/Threonine Phosphorylation in Oral Bacterial Dysbiosis and Bacteria-Host Interactions, *Frontiers in Cellular and Infection Microbiology* 11 (2021). <https://www.frontiersin.org/articles/10.3389/fcimb.2021.814659> (accessed October 23, 2023).

[26] W. Peng, V. Raysaprotu, A.D. Parvate, M.F. Proskier, S. Hui, D. Parekh, K. Shaffer, X. Yu, E.O. Saphire, J. Snijder, Glycan shield of the ebolavirus envelope glycoprotein GP, *Commun Biol* 5 (2022) 1–11. <https://doi.org/10.1038/s42003-022-03767-1>.

[27] L.L. Patterson, T.S. Velayutham, C.D. Byerly, D.C. Bui, J. Patel, V. Veljkovic, S. Passaleri, J.W. McBride, Ehrlichia SLM Ligand Mimetic Activates Notch Signaling in Human Monocytes, *mBio* 13 (2022) e00076-22. <https://doi.org/10.1128/mBio.00076-22>.

[28] A. Paluck, J. Osan, L. Hollingsworth, S.N. Talukdar, A.A. Saegh, M. Mehedi, Role of ARP2/3 Complex-Driven Actin Polymerization in RSV Infection, *Pathogens* 11 (2022) 26. <https://doi.org/10.3390/pathogens11010206>.

[29] J. Osek, K. Wiecek, Listeria monocytogenes—How This Pathogen Uses Its Virulence Mechanisms to Infect the Hosts, *Pathogens* 11 (2022) 1491. <https://doi.org/10.3390/pathogens11121491>.

[30] J. Nunez-Castilla, V. Stebliankin, P. Baral, C.A. Balbin, M. Sobhan, T. Cickovski, A.M. Mondal, G. Narasimhan, P. Chagapain, K. Mathee, J. Silberg-Liberles, Potential Autoimmunity Resulting from Molecular Mimicry between SARS-CoV-2 Spike and Human Proteins, *Viruses* 14 (2022) 1415. <https://doi.org/10.3390/v14071415>.

[31] W. Morzad, A. Balamir, D. Dargatzis, Discovery and Identification of Invariant Members of Adhesin Protein Family, *Journal of Molecular Biology* 294 (2022) 4091071-22. <https://doi.org/10.1126/jmb.2022.294.1071-22>.

[32] J.E. Martin, L. Gomez-Veloso, C. Buchrieser, The evolution and role of eukaryotic-like domains in environmental intracellular bacteria: the battle with a eukaryotic cell, *FEMS Microbiology Reviews* 46 (2022) fuac012. <https://doi.org/10.1093/fems/fuac012>.

[33] J. Martinez-Duncker, F. Chiodo, H.M. Mora-Montes, G.R. Vasta, Editorial: The Role of Glycans in Infectious Disease, *Front. Microbiol.* 13 (2022) 921436. <https://doi.org/10.3389/fmicb.2022.921436>.

[34] J. Liu, F. Lu, Y. Chen, E. Ploeg, J. Qin, Intein mediates cell entry of the SARS-CoV-2 virus independent of cellular receptor ACE2, *Journal of Virology* 298 (2022) 101710. <https://doi.org/10.1016/j.jvirol.2022.101710>.

[35] H. Li, T. Buck, M. Zandorani, J. Yin, A. Moon-Walker, J. Fang, A. Koval, M.L. Heinrich, M.M. Rowland, R. Diaz Avalos, L.S. Schendel, D. Parekh, D. Zyla, A. Enriquez, S. Harkins, B. Sullivan, V. Smith, O. Chukwudozie, R. Watanabe, J.E. Robinson, R.F. Garry, L.M. Branco, K.M. Hastie, E.O. Saphire, A cocktail of protective antibodies subverts the dense glycan shield of Lassa virus, *Science Translational Medicine* 14 (2022) eabq0991. <https://doi.org/10.1126/scitranslmed.2022.0991>.

[36] S. Lee, S. Inzerillo, G.Y. Lee, E.M. Bosire, S.K. Mahato, J. Song, Glycan-mediated molecular interactions in bacterial infections, *Trends in Microbiology* 30 (2022) 254–267. <https://doi.org/10.1016/j.tmic.2021.06.011>.

[37] M. Kumar, S. Khaser, J. Alvarado-Valverde, B. Mézáros, H. Sámano-Sánchez, A. Zeke, L. Dobson, T. Lazar, M. Ort, A. Nagpal, N. Farahi, M. Káser, R. Krales, N.E. Dewar, R. Pansca, L.B. Chemes, T.J. Gibson, The Eukaryotic Linear Motif resource: 2022 release, *Nucleic Acids Research* 50 (2022) D497–D508. <https://doi.org/10.1093/nar/gkab975>.

[38] A. Kuban-Jankowska, T. Kostrowiec, M. Gorska-Ponikwawska, Bacterial Protein Tyrosine Phosphatases as Possible Targets for Antimicrobial Therapies in Response to Antibiotic Resistance, *Antioxidants* 11 (2022) 2367. <https://doi.org/10.3390/antiox11122367>.

[39] S. Kryazev, K. Chhugani, V. Sarwal, R. Ajay, H. Singh, S. Karthikeyan, D. Deshpande, A. Lu, Y. Porozov, T.I. Vasylyeva, J. O. Wertheim, B.T. Tierney, C.A. Wu, M.S. Abedatkhaffi, V.M. Pak, S.H. Nagaraj, A.L. Smith, P. Skums, B. Pasaniuc, A. Kornissarov, C.E. Mason, E. Bortz, P. Lemey, F. Kondrashov, N. Beerenwinkel, T.T.-L. Lam, N.C. Wu, A. Zelkowsky, R. Knight, K.A. Crandall, A. Mangal, Unlocking the

[40] C.-H. Kim, Pathogen-Host Interaction via Glycan Recognition and Interaction, in: C.-H. Kim (Ed.), *Glycobiology of Innate Immunology*, Springer, Singapore, 2022; pp. 199–260. [https://doi.org/10.1007/978-981-16-9081-5\\_5](https://doi.org/10.1007/978-981-16-9081-5_5).

[41] M. Khivchev, M. Soloviev, SNARE Modulators and SNARE Mimetic Peptides, *Biomolecules* 12 (2022) 1779. <https://doi.org/10.3390/biom12121779>.

[42] J. K. Jackson, S. Thudium, D.M. Renner, K. Gladst, K. Palozola, Z. Zhang, Y. Li, Y. Lan, J. Cesare, A. Poleshko, A.A. Kiseleva, R. Trutti, F.L. Cardenas-Diaz, X. Zhang, X. Xie, D.N. Kotton, K.D. Alysandratos, J.A. Epstein, Y.-P. Shi, W. Yang, E. Morrissey, B.A. Garcia, S.L. Berger, S.R. Weiss, E. Korb, SARS-CoV-2 disrupts host epigenetic regulation via histone mimicry, *Nature* 610 (2022) 381–388. <https://doi.org/10.1038/s41586-022-05282-z>.

[43] C. B. Becke, M. Farzan, B. Chen, H. Choe, Mechanisms of SARS-CoV-2 entry into cells, *Nat Rev Mol Cell Biol* 23 (2022) 3–20. <https://doi.org/10.1038/s41586-021-00418-w>.

[44] W.D. Gao, C. Gao, J.E. Dearns, D.C.J. Caporaso, G.L. Smith, S.C. Graham, The crystal structure of nucleocapsid protein E2 and perspectives on the prediction of novel viral protein folds, *Journal of General Virology* 103 (2022) 001716. <https://doi.org/10.1099/jgv.0.001716>.

[45] A.E. Dugan, A.L. Peiffer, L.L. Klesing, Advances in glycoscience to understand viral infection and colonization, *Nat Methods* 19 (2022) 384–387. <https://doi.org/10.1038/s41592-022-01451-0>.

[46] H. de Jong, M.M.S.M. Wolsten, T. Wennekes, Sweet impersonators: Molecular mimicry of host glycans by bacteria, *Glycobiology* 32 (2022) 11–22. <https://doi.org/10.1093/glycob/cwab104>.

[47] S.-H. Cho, J. Park, C.-H. Kim, Systemic Lectin-Glycan Interaction of Pathogenic Enteric Bacteria in the Gastrointestinal Tract, *UMS* 23 (2022) 1451. <https://doi.org/10.3390/ums23031451>.

[48] U.P. Arora, B.L. Dumont, Meiotic drive in house mice: mechanisms, consequences, and insights for human biology, *Chromosome Res* 30 (2022) 165–186. <https://doi.org/10.1007/s10577-022-09697-2>.

[49] Z. Zong, Z. Zhang, L. Wu, L. Zhang, F. Zhou, The Functional Deubiquitinating Enzymes in Control of Innate Antiviral Immunity, *Advanced Science* 8 (2021) 2002484. <https://doi.org/10.1002/adv.2002484>.

[50] X. Zhao, H. Chen, H. Wang, Glycans of SARS-CoV-2 Spike Protein in Virus Infection and Antibody Production, *Frontiers in Molecular Biosciences* 8 (2021). <https://www.frontiersin.org/articles/10.3389/fmolb.2021.629873> (accessed October 31, 2023).

[51] X.-L. Zhang, H. Qu, The Role of Glycosylation in Infectious Diseases, in: G. Luca, I. Trobec-Akmacic (Eds.), *The Role of Glycosylation in Health and Disease*, Springer International Publishing, Cham, 2021; pp. 219–237. [https://doi.org/10.1007/978-3-030-70154-1\\_11](https://doi.org/10.1007/978-3-030-70154-1_11).

[52] P. Simons, D.A. Rinaldi, V. Bondu, A.M. Kell, S. Bradtke, D.S. Lidke, T. Burandt, Innate activation is an essential component of SARS-CoV-2 infection, *Sci Rep* 11 (2021) 20398. <https://doi.org/10.1038/s41598-021-99893-7>.

[53] K.M. Ruff, R.V. Pappu, AlphaFold and Implications for Intrinsically Disordered Proteins, *Journal of Molecular Biology* 433 (2021) 167208. <https://doi.org/10.1016/j.jmb.2021.167208>.

[54] A. Rives, J. Meier, T. Sercu, S. Goyal, Z. Lin, J. Liu, D. Guo, M. Ott, C.L. Zitnick, J. Ma, R. Fergus, Biological structure and function emerge from scaling unsupervised learning to 250 million protein sequences, *Proceedings of the National Academy of Sciences* 118 (2021) e012639118. <https://doi.org/10.1073/pnas.2016239118>.

[55] R. Qin, L.K. Mahal, The host-mycobacterial response to pathogens, *Current Opinion in Structural Biology* 68 (2021) 149–156. <https://doi.org/10.1016/j.sbo.2020.12.011>.

[56] M. Pilon, P. Doublet, Mycobacterium: an Underestimated Player in the Infectious Cycle of Pathogenic Bacteria, *UMS* 22 (2021) 615. <https://doi.org/10.3390/ums22020615>.

[57] C.E. Pegg, S.V. Zachick, E. Bomba-Warczak, V. Jovesvic, D. Kim, H. Kharwaf, D.W. Wilson, D. Walsh, P.J. Sollars, G.E. Rickard, J.N. Savas, G.A. Smith, Herpesviruses assimilate kinesin to produce motorized viral particles, *Nature* 599 (2021) 662–666. <https://doi.org/10.1038/s41586-021-04106-w>.

[58] R. Nakamoto, J.M.C. Kwan, J.F.L. Chin, H.T. Ong, J. Flores-Kim, C. Midonet, M.S. VanNieuwenhize, X.L. Guan, L.-T. Sham, The bacterial tyrosine kinase system CpsB/C governs the length of capsule polymers, *Proceedings of the National Academy of Sciences* 118 (2021) e2103377118. <https://doi.org/10.1073/pnas.2103377118>.

[59] S.A. Mir, Structure and Function of the Integins in Mammalian Monocytes, *Current Protein and Peptide Science* 22 (2021) 420–428. <https://doi.org/10.2174/13892372266821002163300>.

[60] N.L. Miller, T. Clark, R. Raman, R. Sasisekharan, Glycans in Virus-Host Interactions: A Structural Perspective, *Frontiers in Molecular Biosciences* 8 (2021). <https://www.frontiersin.org/articles/10.3389/fmolb.2021.666756> (accessed October 31, 2023).

[61] L. Makowski, W. Olson-Sifford, J. W. Weisel, Biological and Clinical Consequences of Integrin Binding via a RGD Motif in the SARS CoV-2 Spike Protein, *Viruses* 13 (2021) 146. <https://doi.org/10.3390/v13020146>.

[62] H. Mak, T.L.M. Thurston, Interesting Biochemistries in the Structure and Function of Bacterial Effectors, *Frontiers in Cellular and Infection Microbiology* 11 (2021). <https://www.frontiersin.org/articles/10.3389/fcimb.2021.608860> (accessed October 29, 2023).

[63] J. Lu, T. Wu, B. Zhang, S. Liu, W. Song, J. Qiao, H. Ruan, Types of nuclear localization signals and mechanisms of protein import into the nucleus, *Cell Communication and Signaling* 19 (2021) 60. <https://doi.org/10.1186/s12964-021-00741-y>.

[64] Y. Li, D. Liu, Y. Wang, W. Su, G. Liu, W. Dong, The Importance of Glycans of Viral and Host Proteins in Enveloped Virus Infection, *Frontiers in Immunology* 12 (2021). <https://www.frontiersin.org/articles/10.3389/fimmu.2021.638573> (accessed October 31, 2023).

[65] G. Lasso, B. Honig, S.D. Shapiro, A Sweep of Earth's Virome Reveals Host-Guided Viral Protein Structural Mimicry and Points to Determinants of Human Disease, *Cell Systems* 12 (2021) 82–91.e3. <https://doi.org/10.1016/j.cels.2020.09.006>.

[66] S.M. Kremersleiter, A.-S.H. Kroell, K. Weinberger, H. Boehm, Glycan-Lectin Interactions in Cancer and Viral Infections and How to Disrupt Them, *International Journal of Molecular Sciences* 22 (2021) 10577. <https://doi.org/10.3390/ijms221910577>.

[67] M. Kalkha, M. Karbalaie, EPIYA motifs of Helicobacter pylori cagA genotypes and gastrointestinal diseases in the Iranian population: a systematic review and meta-analysis, *New Microbes and New Infections* 41 (2021) 100865. <https://doi.org/10.1016/j.nmni.2021.100865>.

[68] K. Kajala, M. Govaran, L. Shaan-Moshq, G.A. Mason, J. Rodriguez-Medina, D. Kavus, G. Paulluzzi, M. Reynolds, A. Cantó-Pastor, C. Manzano, V. Lau, M.A.S. Arru, D.A. West, S.E. Gray, A.T. Borowsky, B.P. Moore, A.I. Yao, K.W. Morimoto, M. Bajic, E. Formentin, N.A. Nirmal, A. Rodriguez, A. Pasha, R.B. Deal, D.J. Klebenstein, T.R. Hvidsten, N.J. Provart, N.R. Sirha, D.E. Runcie, J. Bailey-Searns, S.M. Brady, Innovation, conservation, and repurposing

[69] K. Iretton, R. Morita, O. C. Gymerwall, A. Gianfranceschi, H. Hussain, Role of intramembran proteins in the pathogenesis of Listeria monocytogenes, *Molecular Microbiology* 118 (2021) 1407–1419. <https://doi.org/10.1111/mmi.14636>.

[70] J. Giorgetti, P.D. Renfret, J. Korman, D. Berenguer, T. Vatanen, C. Chandler, B.C. Taylor, I.M. Fisk, H. Vlamakis, R.J. Xavier, R. Knight, K. Cho, R. Bonneau, Structure-based protein function prediction using graph convolutional networks, *Nat Commun* 12 (2021) 3168. <https://doi.org/10.1038/s41467-021-23303-9>.

[71] T.G. Franklin, J.N. Pruneda, Bacteria make surgical strikes on host ubiquitin signaling, *PLOS Pathogens* 17 (2021) e1009341. <https://doi.org/10.1371/journal.ppat.1009341>.

[72] J. Giorgetti, C.Z. Buffalo, R.M. Hooy, M. Allaire, X. Ren, J.H. Hurley, Structure of SARS-CoV-2 ORF6, a rapidly evolving immune evasion protein, *Proceedings of the National Academy of Sciences* 118 (2021) e021785118. <https://doi.org/10.1073/pnas.2021785118>.

[73] S. Chen, R. Qin, L.K. Mahal, Sweet systems: technologies for glycomic analysis and their integration into systems biology, *Critical Reviews in Biochemistry and Molecular Biology* 56 (2021) 301–320. <https://doi.org/10.1080/10409238.2021.1908953>.

[74] R. Chen, C.A. Ishak, D.D. De Carvalho, Endogenous Retroelements and the Viral Mimicry Response in Cancer Therapy and Cellular Homeostasis, *Cancer Discovery* 11 (2021) 2707–2725. <https://doi.org/10.1158/2159-8290.CCR-21-0506>.

[75] W. Casey, S.E. Massey, B. Mishra, How signalling games explain mimicry at many levels: from viral epidemiology to human sociology, *J. R. Soc. Interface*. 18 (2021) rsif.2020.0689. <https://doi.org/10.1098/rsif.2020.0689>.

[76] D. Bojar, R.K. Powers, D.M. Camacho, J.J. Collins, Deep-Learning Resources for Studying Glycan-Mediated Host-Microbe Interactions, *Cell Host & Microbe* 29 (2021) 132–144.e3. <https://doi.org/10.1016/j.chom.2020.10.004>.

[77] C.A. Beaudon, A.R. Jamsab, A.F. Altsjuml, L. Copou, A.J. van Tonder, S. Hala, B.P. Bernerman, S.E. Thomas, S.C. Vedthi, P.H.M. Torres, T.L. Blundell, Predicted structural mimicry of spike receptor-binding motifs from highly pathogenic human coronaviruses, *Computational and Structural Biotechnology Journal* 19 (2021) 3938–3953. <https://doi.org/10.1016/j.csbj.2021.06.041>.

[78] B. Bao, P.R. Kellman, A.W.T. Chiang, Y. Zhang, J.T. Sorrentino, A.K. York, M.A. Mohammad, M.W. Haymond, L. Bode, N.E. Lewis, Correcting for sparsity and interdependence in glycomics by accounting for glycan biosynthesis, *Nat Commun* 12 (2021) 4988. <https://doi.org/10.1038/s41467-021-25183-5>.

[79] V. Amijos-Jaramillo, N. Espinosa, K. Vizzaloni, D. Santander-Gordón, A Novel In Silico Method for Molecular Mimicry Detection Finds a Formin with the Potential to Manipulate the Maize Cell Cytoskeleton, *MPMI* 34 (2021) 815–825. <https://doi.org/10.1094/MPMI-11-20-0332-R>.

[80] Y. Watanabe, Z.T. Berndtson, J. Raghavji, G.E. Seabright, J.D. Allen, O. G. Pfyfer, J. S. McMillan, I.A. Wilson, T.A. Bowers, A.B. Ward, M. Crispin, Vulnerabilities in coronavirus glycan shields despite extensive glycosylation, *Nat Commun* 11 (2020) 2688. <https://doi.org/10.1038/s41467-020-16567-0>.

[81] D. J. Vaca, A. Thibau, M. Schütz, P. Krieger, J. Haspinger, J. Malmström, V.A.J. Kempf, Interaction with the host: the role of fibronectin and extracellular matrix proteins in the adhesion of Gram-negative bacteria, *Med Microb Immunol* 209 (2020) 277–299. <https://doi.org/10.1007/s00403-019-00644-3>.

[82] H. Sámano-Sánchez, P.T. Gibson, Mimicry of Short Linear Motifs by Bacterial Pathogens: A Degrading Antagonism, *Trends in Biochemical Sciences* 45 (2020) 526–544. <https://doi.org/10.1016/j.tibs.2020.03.002>.

[83] M. Mukhi, D. Gorenkii, M.J. Banfield, Exploring folds, evolution and host interactions: understanding effector structure-function in disease and immunity, *New Phytologist* 227 (2020) 326–333. <https://doi.org/10.1111/nph.16563>.

[84] S. Mondino, S. Schmidt, C. Buchrieser, Molecular Mimicry: A Paradigm of Host-Microbe Coevolution Illustrated by Legionella, *mBio* 11 (2020) e01201-20. <https://doi.org/10.1128/mBio.01201-20>.

[85] A.A. Mauro, C.K. Ghambor, Trade-offs, Pleiotropy, and Shared Molecular Pathways: A Unified View of Constraints on Adapt

- [91] C.M. Fridman, K. Keppel, E. Gerlic, E. Bosis, D. Salomon, A comparative genomics methodology reveals a widespread family of membrane-disrupting T6SS effectors. *Nat Commun* 11 (2020) 1085. <https://doi.org/10.1038/s41467-020-14951-4>.
- [92] K. Fenn, C.T. Wong, V.C. Darban, Mycobacterium tuberculosis Uses Mce Proteins to Interfere With Host Cell Signaling. *Frontiers in Molecular Biosciences* 6 (2020). <https://www.frontiersin.org/articles/10.3389/fmobi.2019.00149> (accessed October 17, 2023).
- [93] N.S. de Groot, M. Torrent Burgos, Bacteria use structural imperfect mimicry to hijack the host interactome. *PLoS Comput Biol* 16 (2020) e1008395. <https://doi.org/10.1371/journal.pcbi.1008395>.
- [94] K.A. Chambers, R.A. Scheck, Bacterial virulence mediated by orthogonal post-translational modification. *Nat Chem Biol* 16 (2020) 1043–1055. <https://doi.org/10.1038/s41589-020-0638-2>.
- [95] S. Chakraborty, D. Balakrishnan, A.J. Trotter, W.H. Gilens, A.W.H. Yang, A. Jolma, J.R. Patterson, S. Swiatek, J. Plewka, F.A. Curtis, L.J. Bowers, L.-O. Palsson, T.R. Hughes, M. Taube, M. Kozak, J. G. Hedde, G.J. Sharples, A bacteriophage mimic of the bacterial nucleoid-associated protein Fis. *Biochemical Journal* 477 (2020) 1345–1362. <https://doi.org/10.1042/BJC20200146>.
- [96] L. Cassinini, Z. Gales, J.A. Goldsmith, C.K. Horth, A.C. Donnerer, A.M. Harrison, C.A. Fogarty, E.P. Barros, B.C. Taylor, J.S. McClellan, E. Fedor, R.E. Amaro, Beyond Shielding: The Roles of Glycans in the SARS-CoV-2 Spike Protein. *ACS Cent. Sci.* 6 (2020) 1722–1734. <https://doi.org/10.1021/acscentsci.0c01056>.
- [97] M.A. Bravo Núñez, I.M. Sabatini, M.T. Eickbush, Y. Liang, J.J. Lange, A.M. Kent, S.E. Zanders, Dramatically diverse Schizosaccharomyces pombe viri meiotic drivers all display high gamete-killing efficiency. *PLoS Genet* 16 (2020) e1008350. <https://doi.org/10.1371/journal.pgen.1008350>.
- [98] A. Bird, The Selfishness of Law-Abiding Genes. *Trends in Microbiology* 36 (2020) 8–13. <https://doi.org/10.1016/j.tmic.2019.10.002>.
- [99] J. Atherton, J.J. Hummel, N. Olicic, J. Locke, A. Peña, S.S. Rosenfeld, M. Steinmetz, C.C. Hoogenraad, C.A. Moores, The mechanism of kinesin inhibition by kinesin-binding protein. *eLife* 9 (2020) e61481. <https://doi.org/10.7554/eLife.61481>.
- [100] P. Anand, A. Purank, M. Aravamudan, A. Venkateshkrishnan, V. Soundararajan, SARS-CoV-2 strategically mimics proteolytic activation of human ENaC. *eLife* 9 (2020) e58603. <https://doi.org/10.7554/eLife.58603>.
- [101] Z. Zhao, A. Shilatifard, Epigenetic modifications of histones in cancer. *Genome Biology* 20 (2019) 245. <https://doi.org/10.1186/s13059-019-1870-5>.
- [102] Y. Watanabe, T.A. Bowden, I.A. Wilson, M. Crispin, Exploitation of glycoylation in enveloped virus pathobiology. *Biochimica et Biophysica Acta (BBA) - General Subjects* 1863 (2019) 1480–1497. <https://doi.org/10.1016/j.bbagen.2019.05.012>.
- [103] A.A. Vogan, S.L. Ament-Velásquez, A. Granger-Farjós, J. Svedberg, E. Bastiaans, A.J. Debets, V. Coustou, H. Yvonne, C. Clavé, S.J. Saue, H. Johannesson, Combinations of Spok genes create multiple meiotic drivers in *Podopora*. *eLife* 8 (2019) e46454. <https://doi.org/10.7554/eLife.46454>.
- [104] A.J. Thompson, R.P. de Vries, J.C. Paulson, Virus recognition of glycan receptors. *Current Opinion in Virology* 34 (2019) 117–129. <https://doi.org/10.1016/j.coviro.2019.01.004>.
- [105] K. Tengvall, J. Huang, C. Hellström, P. Kammer, M. Blåström, B. Aygüel, I. Lima Bonfim, P. Stridh, J. Butt, N. Brenner, A. Michel, K. Lundberg, L. Padyukov, I.E. Lundberg, E. Svenungsson, I. Erberg, S. Olafsson, A.T. Dilthey, J. Hillert, L. Alfredsson, P. Sundström, P. Nilsson, T. Waterboer, T. Olsson, I. Kockum, Molecular mimicry between Anoctamin 2 and Epstein-Barr virus nuclear antigen 1 associates with multiple sclerosis risk. *Proc Natl Acad Sci U S A* 116 (2019) 12983. <https://doi.org/10.1073/pnas.1916204116>.
- [106] J. Nahir, M. Rashid, A.J. Altzel, Post-translational modifications in effectors and plant proteins involved in host-pathogen conflicts. *Plant Pathology* 68 (2019) 628–644. <https://doi.org/10.1111/ppa.12983>.
- [107] X. Su, G. Cao, J. Zhang, H. Pan, D. Zhang, D. Kuang, X. Yang, X. Xu, X. Shi, J. Meng, Characterization of internalin genes in *Listeria monocytogenes* from food and humans, and their association with the invasion of Caco-2 cells. *Gut Pathogens* 11 (2019) 30. <https://doi.org/10.1186/s13099-019-0307-8>.
- [108] J. S. Srimulio, M. Opliva, C. Vileflez, D. Ochoa, M. Shahraz, B.P. Busby, R. Sapko, L.A. Studer, H. Permon, V. Bellar, Conserved phosphorylation hotspots in eukaryotic protein domain families. *Nat Commun* 10 (2019) 1917. <https://doi.org/10.1038/s41467-019-09562-x>.
- [109] O. Spitz, I.M. Ehrenborg, T. Beer, K. Kanonenberg, L. B. Hillier, L. Schmitt, Type IV Secretion Systems—One Mechanism for All? *Microbiol Spectr* 7 (2019). <https://doi.org/10.1128/microbiolspec.PSIB-0003-2018>.
- [110] J.E. Silpe, B.L. Bassler, A Self-Produced Quorum-Sensing Autoinducer Controls a Phage Lysis-Regulatory Decision. *Cell* 176 (2019) 282–290. <https://doi.org/10.1016/j.cell.2018.10.059>.
- [111] G.E. Seabright, K.J. Doores, D.R. Burton, M. Crispin, Protein and Cellular Mimicry in HIV Vaccine Design. *J Mol Biol* 431 (2019) 2223–2247. <https://doi.org/10.1016/j.jmb.2019.04.016>.
- [112] E. Scott, J. Munkley, Glycans as Biomarkers in Prostate Cancer. *IMS* 20 (2019) 1389. <https://doi.org/10.3390/ims20061389>.
- [113] J.W. Rick, A. Chandra, C. Dalle Ore, A.T. Nguyen, G. Yagnik, M.K. Aghi, Fibronectin in malignancy: Cancer-specific alterations, prognostic effects, and therapeutic implications. *Seminars in Oncology* 46 (2019) 284–290. <https://doi.org/10.1053/j.seminoncol.2019.08.002>.
- [114] P.C. Lopes, A.K. Lindholm, A selfish genetic element linked to increased lifespan impacts metabolism in female house mice. *Journal of Experimental Biology* (2019) jeb.212704. <https://doi.org/10.1242/jeb.212704>.
- [115] P. Le Mercier, J. Mariethoz, J. Lascano-Maillard, F. Bonnardel, A. Imberby, S. Ricard-Blum, F. Lisacek, A Bioinformatics View of Glycan–Virus Interactions. *Viruses* 11 (2019) 374. <https://doi.org/10.3390/v11040374>.
- [116] M.M. Konaté, G. Plata, J. Park, D.R. Usmanova, H. Wang, D. Vitkup, Molecular function limits divergent protein evolution on planetary timescales. *eLife* 8 (2019) e39705. <https://doi.org/10.7554/eLife.39705>.
- [117] M. Koehler, P. Aravamudan, C. Guzman-Cardozo, A.C. Dumitru, J. Yang, S. Gargiulo, J. S. Dermody, D. Alsteins, Glycan-mediated enhancement of reovirus receptor binding. *Nat Commun* 10 (2019) 4460. <https://doi.org/10.1038/s41467-019-12411-2>.
- [118] R. Jiang, S. Vandal, S. Park, S. Majd, E. Tüzel, W.O. Hancock, Microtubule binding kinetics of membrane-bound kinesin-1 predicts high motor copy numbers on intracellular cargo. *Proceedings of the National Academy of Sciences* 116 (2019) 26564–26570. <https://doi.org/10.1073/pnas.1916204116>.
- [119] E. Harter, C. Lassing, E.M. Wagner, A. Zaiser, M. Wagner, K. Rychli, The Novel Internalin InlP1 and InlP4 and the Internalin-Like Protein InlP3 Enhance the Pathogenicity of *Listeria monocytogenes*. *Frontiers in Microbiology* 10 (2019). <https://www.frontiersin.org/articles/10.3389/fmicb.2019.01644> (accessed October 31, 2023).
- [120] L.J. Getz, C.S. Runte, J.K. Rainey, N.A. Thomas, Tyrosine Phosphorylation as a Widespread Regulatory Mechanism in Prokaryotes. *Journal of Bacteriology* 201 (2019) 1128. <https://doi.org/10.1128/jb.00205-19>.
- [121] C.J. Frank, Molecular host mimicry and manipulation in bacterial symbionts. *FEMS Microbiology Letters* 368 (2019) 192. <https://doi.org/10.1093/femsle/fnz038>.
- [122] J. D. Driessens, P. Yagci, P. Cossart, *Listeria monocytogenes*: From T.M. Schmidt (Ed.), *Encyclopedia of Microbiology* (Fourth Edition). Academic Press, Oxford, 2019. pp. 803–818. <https://doi.org/10.1016/B978-0-12-801238-3.02297-2>.
- [123] M. del Giudice, Inevitable Designers: Brain Evolution Through the Lens of Pathogen Manipulation. *The Quarterly Review of Biology* 94 (2019) 249–282. <https://doi.org/10.1086/705038>.
- [124] M. Charman, C. Herrmann, M.D. Weitzman, Viral and cellular interactions during adenovirus DNA replication. *FEMS Letters* 593 (2019) 3531–3550. <https://doi.org/10.1002/1873-3468.13695>.
- [125] Y. Chalenko, E. Kalinin, V. Marchenkov, E. Svyatayna, A. Surin, K. Sobyanin, S. Ermolova, Phylogenetically Defined Isoforms of *Listeria monocytogenes* Invasion Factor InlB Differentially Activate Intracellular Signaling Pathways and Interact with the Receptor γC1q-R. *International Journal of Molecular Sciences* 20 (2019) 4138. <https://doi.org/10.3390/ijms20194138>.
- [126] G.A. Castillo Villamizar, H. Nacke, L. Giese, L. Tabernoero, K. Funke, R. Daniel, Characteristics of the First Protein Tyrosine Phosphatase with Phytase Activity from a Soil Metagenome. *Genes* 10 (2019) 101. <https://doi.org/10.3390/genes10020101>.
- [127] M. Buß, N. Tegtmeyer, J. Schneider, X. Dong, J. Li, T.A. Springer, S. Backert, H.H. Niemann, Specific high affinity interaction of Helicobacter pylori CagA with integrin αVβ6 promotes type IV secretion of CagA into human cells. *The FEBS Journal* 286 (2019) 3980–3997. <https://doi.org/10.1111/febs.14962>.
- [128] B. Bhattacharyya, R. Sowdhamini, Genome-Wide Search for Tyrosine Phosphatases in the Human Genome Through Computational Approaches Leads to the Discovery of Few New Domain Architectures. *Evol Bioinform Online* 15 (2019) 1176934319840289. <https://doi.org/10.1177/1176934319840289>.
- [129] Y. Zhang, J. Li, B. Li, J. Wang, C.H. Liu, Mycobacterium tuberculosis Mce3C promotes mycobacteria entry into macrophages through activation of β2 integrin-mediated signaling pathway. *Cellular Microbiology* 20 (2018) e12800. <https://doi.org/10.1111/cmi.12800>.
- [130] W.I. Weis, B.K. Koblik, The Molecular Basis of G Protein–Coupled Receptor Activation. *Annual Review of Biochemistry* 87 (2018) 897–919. <https://doi.org/10.1146/annurev-biochem-060614-033910>.
- [131] Y. Watanabe, J. Raghavani, J.D. Allen, G.E. Seabright, S. Li, F. Moser, J.T. Huiskonen, T. Strecker, T.A. Bowden, M. Crispin, Structure of the *Listeria monocytogenes* Invasin Protein InlA Reveals a Model for Immunological Resistance. *Proceedings of the National Academy of Sciences* 115 (2018) 7320–7325. <https://doi.org/10.1073/pnas.1803999115>.
- [132] P. Vechtova, J. Šterbová, J. Šterba, M. Vancová, R.O.M. Rego, M. Selinger, M. Strnad, M. Golovchenko, N. Rudenko, L. Grubhöfer, A bite so sweet: the glycoylation interface of tick-host-pathogen interactions. *Parasites Vectors* 11 (2018) 594. <https://doi.org/10.1186/s13071-018-3062-7>.
- [133] T.D.R. Vance, L.A. Graham, P.L. Davies, An ice-binding and tandem beta-sandwich domain-containing protein in *Stenella frigidimarina* is a potential new type of ice adhesion. *The FEBS Journal* 285 (2018) 1511–1527. <https://doi.org/10.1111/febs.14424>.
- [134] S.L. Taylor, M.A. McGuirk, S. Wesselingh, G.B. Rogers, Infection’s Sweet Tooth: How Glycans Mediate Infection and Disease Susceptibility. *Trends in Microbiology* 26 (2018) 92–101. <https://doi.org/10.1016/j.tmic.2017.09.011>.
- [135] A. Taraskhovich, R.K. Prinja, Drawing on disaster: How viruses use histone mimicry to their advantage. *J Exp Med* 215 (2018) 1777–1787. <https://doi.org/10.1084/jem.20180099>.
- [136] L. Stewart, I.D.M. Edgar, G. Blackley, S. Patrick, Antigenic mimicry of ubiquitin by the gut bacterium *Bacteroides fragilis*: a potential link with autoimmune disease. *Clinical and Experimental Immunology* 194 (2018) 153–165. <https://doi.org/10.1111/cei.13195>.
- [137] P. Sadana, R. Geyer, J. Pezolt, S. Helmsing, J. Huehn, M. Hust, P. Dersch, A. Scrima, The Invasin D protein from *Versinia pseudotuberculosis* selectively binds the Fab region of host antibodies and affects colonization of the intestine. *Journal of Biological Chemistry* 293 (2018) 8672–8690. <https://doi.org/10.1074/jbc.RA117.010688>.
- [138] M. Rojas, P. Restrepo-Jiménez, D.M. Monsalve, Y. Pacheco, Y. Acosta-Ampudia, C. Ramirez-Santana, P.S.C. Leung, A.A. Ansari, M.E. Gershwin, J.-M. Anaya, Molecular mimicry and autoimmunity. *Journal of Autoimmunity* 95 (2018) 100–123. <https://doi.org/10.1016/j.jaut.2018.10.012>.
- [139] M. Paulsson, K. Riebeck, How bacteria hack the matrix and dodge the bullets of immunity. *European Respiratory Review* 27 (2018). <https://doi.org/10.1183/16000671.0018-2018>.
- [140] S.E. Massey, B. Mishra, Origin of biomolecular games: deception and molecular evolution. *J. R. Soc. Interface*. 15 (2018) 20180429. <https://doi.org/10.1098/rsif.2018.0429>.
- [141] E. Martinez, F.A. Siadous, M. Bonazzi, Tiny architects: biogenesis of intracellular replicative niches by bacterial pathogens. *FEMS Microbiology Reviews* (2018). <https://doi.org/10.1093/femsrev/fuy013>.
- [142] P. Mijundir, Integrin-Mediated Delivery of Drugs and Nucleic Acids for Anti-Angiogenic Cancer Therapy: Current Landscapes and Remaining Challenges. *Bioengineering* 5 (2018) 76. <https://doi.org/10.3390/bioengineering5040076>.
- [143] B. LaFoya, J.A. Murroe, A. Miyamoto, M.A. Detweiler, J.J. Crow, T. Gazdik, A.R. Albig, Beyond the Matrix: The Many Non-ECM Ligands for Integrins. *International Journal of Molecular Sciences* 19 (2018) 449. <https://doi.org/10.3390/ijms19020449>.
- [144] H. Jin, J. Wang, X. Liu, S. Fang, B. Jiang, K. Hofmann, J. Yin, B. Zhao, Ubiquitin-Mimicking Peptides Transfer Differentiates by E1 and E2 Enzymes. *BioMed Research International* 2018 (2018) e606250. <https://doi.org/10.1155/2018/606250>.
- [145] H. Hamidi, J. Ivaska, Every step of the way: integrins in cancer progression and metastasis. *Nat Rev Cancer* 18 (2018) 533–548. <https://doi.org/10.1038/s41568-018-0038-z>.
- [146] D.H. Dreyfus, A. Farina, G.A. Farina, Molecular mimicry, genetic homology, and gene sharing proteomic “molecular fingerprints” using an EBV (Epstein-Barr virus)-derived microarray as a potential diagnostic method in autoimmune disease. *Immunol Res* 66 (2018) 686–695. <https://doi.org/10.1007/s12026-018-9045-0>.
- [147] H.D. Cross, S. Runt, Glycan recognition at the saliva–oral microbiome interface. *Cellular Microbiology* 33 (2018) 19–33. <https://doi.org/10.1111/cmi.12854>.
- [148] M.J. Cheng, C. Chen, P. Engstrom, D.A. Portnoy, G. Mitchell, Actin-based motility allows *Listeria monocytogenes* to avoid autophagy in the macrophage cytosol. *Cell Microbiol* 20 (2018) 519–528. <https://doi.org/10.1111/cmi.12854>.
- [149] M.A. Bravo Núñez, J.J. Lange, S.E. Zanders, A suppressor of a wolf poison-antidote meiotic driver acts via mimicry of the driver’s antidote. *PLoS Genet* 14 (2018) e1007836. <https://doi.org/10.1371/journal.pgen.1007836>.
- [150] P. Barlow, Grasping the neck: A bacterial invasin that targets immunoglobulin variable domains. *Journal of Biological Chemistry* 293 (2018) 8691–8692. <https://doi.org/10.1074/jbc.H118.002949>.
- [151] N. Tegtmeyer, S. Wessler, V. Necci, M. Rhode, A. Herr, T.T. Rau, C.J. Asche, M. Boehm, H. Lossner, C. Figueiredo, M. Naumann, R. Palmisano, E. Sokla, V. Ricci, S. Backert, Helicobacter pylori Employs a Unique Basolateral Type IV Secretion Mechanism for CagA Delivery. *Cell Host & Microbe* 22 (2017) 552–560.e5. <https://doi.org/10.1016/j.chom.2017.09.005>.
- [152] N.E. Scott, E.L. Hartland, Post-translational Mechanisms of Host Subversion by Bacterial Effectors. *Trends in Molecular Medicine* 23 (2017) 1089–1102. <https://doi.org/10.1016/j.tmm.2017.01.003>.
- [153] M.S. Ravindran, M.F. Engelke, K.J. Verhey, B. Tsai, Exploiting the kinesin-1 molecular motor to generate a virus membrane penetration site. *Nat Commun* 8 (2017) 15496. <https://doi.org/10.1038/ncomms15496>.
- [154] N. Martinez-Martin, Technologies for Proteome-Wide Discovery of Extracellular Host-Pathogen Interactions. *Journal of Immunology Research* 2017 (2017) e2197615. <https://doi.org/10.1155/2017/2197615>.
- [155] R.L.M. Lamason, M.D. Welch, Actin-based motility and cell-to-cell spread of bacterial pathogens. *Current Opinion in Microbiology* 35 (2017) 48–57. <https://doi.org/10.1016/j.coviro.2016.11.007>.
- [156] M. HATAKEYAMA, Structure and function of Helicobacter pylori CagA, the first-identified bacterial protein involved in human cancer. *Proc Jpn Acad Ser B Phys Biol Sci* 93 (2017) 196–219. <https://doi.org/10.2183/pjab.93.013>.
- [157] J. Han, K. Pluhackova, R.A. Böckmann, The Multifaceted Role of SNARE Proteins in Membrane Fusion. *Frontiers in Physiology* 8 (2017). <https://www.frontiersin.org/articles/10.3389/fphys.2017.00005> (accessed October 29, 2023).
- [158] E. Guven-Maiorov, C.-J. Tsai, R. Nussinov, Structural host-microbiota interaction networks. *PLoS Computational Biology* 13 (2017) e1005579. <https://doi.org/10.1371/journal.pcbi.1005579>.
- [159] A. Güell, R.M. Corrales, M.L. Parker, M.H. Lamarque, D. Jactot, H. El Hagi, D. Söldner-Favre, M.J. Boulanger, M. Lebrun, Efficient invasion by *Toxoplasma* depends on the subversion of host protein networks. *Nat Microbiol* 2 (2017) 1358–1366. <https://doi.org/10.1038/s41564-017-0018-1>.
- [160] E.W.D. Gao, D.-C. Carpenter, H.A. Evans, S.-A. Lee, G.L. Smith, Vaccinia virus protein A36 and F12E2 show strong preferences for different kinesin light chain isoforms. *Cell Microbiol* 20 (2018) 519–528. <https://doi.org/10.1111/cmi.12854>.
- [161] E. Cornijo, P. Sarmiento, S. Mulheisen, How to rewrite the host cell: A home improvement guide for intracellular bacteria. *Cell Cell* 216 (2017) 3931–3948. <https://doi.org/10.1083/jcb.201701095>.
- [162] D.C.J. Carpenter, A. Van Loggenberg, N.M.G. Diekmann, G.L. Smith, Vaccinia virus egress mediated by virus protein A36 is reliant on the F12 protein. *Journal of General Virology* 98 (2017) 1500–1514. <https://doi.org/10.1099/jgv.0.000816>.
- [163] S. Backert, N. Tegtmeyer, Type IV Secretion and Signal Transduction of Helicobacter pylori CagA through Interactions With Host Cell Receptors. *Toxins* 9 (2017) 115. <https://doi.org/10.3390/toxins9040115>.
- [164] D.C. Avgousti, A.N. Della Ferreira, C.J. Otter, C. Herrmann, N.J. Pancholi, M.D. Weitzman, Adenovirus Core Protein IV Downregulates the DNA Damage Response on the Host Genome. *Journal of Virology* 91 (2017) 10.1128/jvi.01089-17. <https://doi.org/10.1128/jvi.01089-17>.
- [165] G.B.E. Stewart-Jones, C. Soto, T. Lemmer, G.-Y. Chuang, A. Druz, R. Kong, P.V. Thomas, M.J. Weitzman, C.W. Choi, J.R. Davison, I.S. Georgiev, M.G. Joyce, V.D. Kwon, M. Panceria, J. Taft, Y. Yang, B. Zhang, S.S. Shvartsev, C.-D. Lee, C.-Y. Wu, C.A. Bewley, D.R. Burton, W.C. Koff, M. Connors, M. Crispin, U. Baxa, B.T. Korber, C.-H. Wong, J.R. Masciola, P.D. Kwong, Trimeric HIV-1 Env Structures Def
- [166] X. Shi, P. Halder, H. Yavuz, R. Jahn, H.A. Shuman, Direct targeting of membrane fusion by SNARE mimicry: Convergent evolution of Legionella effectors. *Proceedings of the National Academy of Sciences* 113 (2016) 8807–8812. <https://doi.org/10.1073/pnas.1608755113>.
- [167] H. Seligmann, D. Raouf, Unifying view of stem-loop hairpin RNA as origin of current and ancient parasitic and non-parasitic RNAs, including in giant viruses. *Current Opinion in Microbiology* 31 (2016) 1–8. <https://doi.org/10.1016/j.coviro.2015.11.004>.
- [168] M. Rolando, P. Escoll, T. Nora, J. Botti, V. Botlez, C. Bedia, C. Daniels, G. Abraham, J.P. Stojkos, T. Skarina, C. Christophe, D. Derwins-Ravaux, C. Cazalet, H. Hibi, T.W.T. Rupasinghe, D. Tuli, M.J. McConville, S.Y. Ong, E.L. Hartland, P. Codogno, T. Levede, T. Naderer, A. Savchenko, C. Buchsner, Legionella pneumophila ST1P-yase targets host sphingolipid metabolism and restrains autophagy. *Proceedings of the National Academy of Sciences* 113 (2016) 12602–12607. <https://doi.org/10.1073/pnas.1519441113>.
- [169] D. Reynolds, T. Thomas, Evolution of eukaryotic-like proteins from sponge symbionts. *Mol Ecol* 25 (2016) 5242–5253. <https://doi.org/10.1111/mec.13812>.
- [170] R. Raman, K. Tharakaraman, V. Sasisekharan, Glycan–protein interactions in viral pathogenesis. *Current Opinion in Structural Biology* 40 (2016) 153–162. <https://doi.org/10.1016/j.sbi.2016.10.003>.
- [171] D.G. Moriel, B. Heras, J.J. Paxman, A.W. Lo, L. Tan, M.J. Sullivan, J.J. Dando, S.A. Beatson, G.C. Ulett, M.A. Schermer, Molecular and Structural Characterization of a Novel Escherichia coli Interleukin Receptor Mimic Protein. *mBio* 7 (2016) e02046-15. <https://doi.org/10.1128/mBio.02046-15>.
- [172] J. Marelli, K. Khatib, D. Alcocci, M.P. Campbell, N.G. Karlsson, H.H. Packer, E.H. Mullen, F. Lisacek, SugarBindsDB, a resource of glycan-mediated host–pathogen interactions. *Nucleic Acids Res* 44 (2016) D1243–D1250. <https://doi.org/10.1093/nar/gkv1247>.
- [173] J.P. Hyman, T.R. Kienhammer, Stuck in the Middle: Fibronectin-Binding Proteins in Gram-Positive Bacteria. *Frontiers in Microbiology* 7 (2016). <https://www.frontiersin.org/articles/10.3389/fmicb.2016.01054> (accessed October 29, 2023).
- [174] M.L. Huang, C.J. Fisher, K. Cochla, Glycomaterials for probing host–pathogen interactions and the immune response. *Exp Biol Med* (Maywood) 241 (2016) 1042–1053. <https://doi.org/10.1177/1535370116647811>.
- [175] E. Guven-Maiorov, C.-J. Tsai, R. Nussinov, Pathogen mimicry of host protein–protein interactions modulates immunity. *Seminars in Cell & Developmental Biology* 58 (2016) 136–145. <https://doi.org/10.1016/j.semcdb.2016.06.004>.
- [176] M. Dhara, A. Yarzagar, M. Makke, B. Schindeldecker, Y. Schwarz, A. Shaaban, S. Sharma, R.A. Beckmann, M. Lindau, R. Mohlmann, D. Bruns, v-SNARE transmembrane domains function as catalysts for vesicle fusion. *eLife* 5 (2016

[182] A. Via, B. Uyar, C. Brun, A. Zanoni. How pathogens use linear motifs to perturb host cell networks. *Trends in Biochemical Sciences* 40 (2015) 36–48. <https://doi.org/10.1016/j.tibs.2014.11.001>.

[183] A. Varki, R. Kannagi, B. Toole, P. Stanley. Glycosylation Changes in Cancer. In: A. Varki, R.D. Cummings, J.D. Esko, P. Stanley, G.W. Hart, M. Aebi, A.G. Davilli, T. Kinoshita, N.H. Packer, J.H. Prestegard, R.L. Schnaar, P.H. Seeberger (Eds.), *Essentials of Glycobiology*, 3rd ed., Cold Spring Harbor Laboratory Press, Cold Spring Harbor (NY), 2015. <http://www.ncbi.nlm.nih.gov/books/NBK453023/> (accessed October 31, 2023).

[184] T. Suetsugu, H. Arase. Viral Interactions with Glycans. In: N. Taniuchi, T. Endo, G.W. Hart, P.H. Seeberger, C.-H. Wong (Eds.), *Glycoscience: Biology and Medicine*, Springer Japan, Tokyo, 2015. pp. 785–794. [https://doi.org/10.1007/978-4-431-54841-6\\_152](https://doi.org/10.1007/978-4-431-54841-6_152).

[185] A. Salazar, B. Fürstentau, C. Quero, N. Pérez-Hidalgo, P. Carazo, E. Fort, D. Martínez-Torres. Aggressive mimicry coexists with mutualism in an aphid. *Proceedings of the National Academy of Sciences* 112 (2015) 1101–1106. <https://doi.org/10.1073/pnas.1414061112>.

[186] K.R. Nitta, A. Jóna, Y. Yin, E. Morgunova, T. Kivija, J. Akhtar, K. Hens, J. Tolonen, B. Deplénoké, E.E.M. Furlong, J. Tapale. Conservation of transcription factor binding specificities across 600 million years of bilateria evolution. *eLife* 4 (2015) e04837. <https://doi.org/10.7554/eLife.04837>.

[187] K.K. Jernigan, S.R. Bordenstein. Tandem-repeat protein domains across the tree of life. *PeerJ* 3 (2015) e732. <https://doi.org/10.7717/peerj.732>.

[188] H.A.M. Hussain, R.L. Waller, U.M. Abdel-Rauf, S.A. Dessouky, A.K.M. Montasser, S.M. Akula. Beyond RGD: virus interactions with integrins. *Arch Virol* 160 (2015) 2669–2681. <https://doi.org/10.1007/s00705-015-2579-8>.

[189] F.O. Hebert, L. Phelps, J. Samonte, M. Panchal, S. Grambauer, J. Barber, M. Kabra, C.R. Landry, N. Aubin-Horth. Identification of candidate mimicry proteins involved in parasite-driven phenotypic changes. *Parasites & Vectors* 8 (2015) 225. <https://doi.org/10.1186/s13071-015-0834-1>.

[190] D.T. Haynie, B. Xue. Superdomains in the protein structure hierarchy. *The case of PTP-CD2*. *Protein Science* 24 (2015) 874–882. <https://doi.org/10.1002/psc.2664>.

[191] E. Gillenius, C.F. Urban. The adhesive protein invasin of *Yersinia pseudotuberculosis* induces neutrophil extracellular traps via  $\beta 1$  integrins. *Microbes and Infection* 17 (2015) 327–336. <https://doi.org/10.1016/j.micinf.2014.12.014>.

[192] J. Dworkin. Ser/Thr phosphorylation as a regulatory mechanism in bacteria. *Current Opinion in Microbiology* 24 (2015) 47–52. <https://doi.org/10.1016/j.cob.2015.01.005>.

[193] N. Duro, M. Miskei, M. Fuxreiter. Fuzziness endows viral motif-mimicry. *Molecular BioSystems* 11 (2015) 2821–2829. <https://doi.org/10.1039/C5MB00301F>.

[194] M. de Souza Santos, K. Orth. Subversion of the cytoskeleton by intracellular bacteria: lessons from *Listeria*, *Salmonella* and *Vibrio*. *Cellular Microbiology* 17 (2015) 164–173. <https://doi.org/10.1111/cmi.12399>.

[195] C.J. Day, E.N. Tran, E.A. Semchenko, G. Tram, L.E. Hartley-Tassell, P.S.K. Ng, R.M. King, R. Ulanovsky, S. McAtamney, M.A. Apicella, J. Tiralongo, R. Morona, V. Korolik, M.P. Jennings. Glycan-glycan interactions: High affinity biomolecular interactions that can mediate binding of pathogenic bacteria to host cells. *Proc. Natl. Acad. Sci. U.S.A.* 112 (2015) <https://doi.org/10.1073/pnas.1421082112>.

[196] A.P. Corfield, M. Berry. Glycan variation and evolution in the eukaryotes. *Trends in Biochemical Sciences* 40 (2015) 351–359. <https://doi.org/10.1016/j.tibs.2015.04.004>.

[197] O.C.J. Carpentier, W.N.D. Gao, H. Ewles, G.W. Morgan, G.L. Smith. Vaccinia Virus Protein Complex F12E2 Interacts with Kinesin Light Chain Isoform 2 to Engage the Kinesin-1 Motor Complex. *PLoS Pathog* 11 (2015) e1004723. <https://doi.org/10.1371/journal.ppat.1004723>.

[198] D.A. Bonser, K.T. Pham, R. Beadenkopf, K. Diederichs, R. Haas, D. Beckitt, W. Fischer, E.J. Sundberg. Integral Engagement by the Helical RGD Motif of the Helicobacter pylori CagA Protein Is Regulated by pH-Induced Displacement of a Neighboring Helix. *Journal of Biological Chemistry* 290 (2015) 12929–12940. <https://doi.org/10.1074/jbc.M115.641829>.

[199] H. Bachman, J. Nicam, M. Dyrst, T.H. Barker. Utilizing Fibronectin Integrin-Binding Specificity to Control Cellular Responses. *Advances in Wound Care* 4 (2015) 501–511. <https://doi.org/10.1089/wound.2014.0621>.

[200] A. Amara, J. Mercer. Viral glycoprotein. *Nat Rev Microbiol* 13 (2015) 461–469. <https://doi.org/10.1038/nrmicro3469>.

[201] C.J. Wright, P. Xue, T. Hirose, C. Liu, S.E. Whitmore, M. Hackett, R.J. Lamont. Characterization of a bacterial tyrosine kinase in *Porphyromonas gingivalis* involved in polymicrobial synergy. *MicrobiologyOpen* 3 (2014) 383–394. <https://doi.org/10.1002/mbo3.1177>.

[202] H.-C. Wang, C.-H. Ho, K.-C. Hsu, J.-M. Yang, A.H.-J. Wang. DNA MIMIC Proteins: Functions, Structures, and Bioinformatic Analysis. *Biochemistry* 53 (2014) 2865–2874. <https://doi.org/10.1021/bi500289g>.

[203] B. Venkataram Prasad, S. Shanker, L. Hu, J.-M. Choi, S.E. Crawford, S. Ramani, R. Czado, R.L. Atmar, M.K. Estes. Structural basis of glycan interaction in gastroenteric viral pathogens. *Current Opinion in Virology* 7 (2014) 119–127. <https://doi.org/10.1016/j.coviro.2014.05.008>.

[204] W. Van Breedam, S. Pöhlmann, H.W. Favoreel, R.J. de Groot, H.J. Nauwynck. Bitter-sweet symphony: glycan-lectin interactions in virus biology. *FEMS Microbiology Reviews* 38 (2014) 598–632. <https://doi.org/10.1111/1574-6976.12052>.

[205] D. Tsugama, S. Liu, T. Takano. Analysis of Functions of VIP1 and Its Close Homologs in Osmosensory Responses of *Arabidopsis thaliana*. *PLOS ONE* 9 (2014) e103930. <https://doi.org/10.1371/journal.pone.0103930>.

[206] P. Tompa, N.E. Davey, T.J. Gibson, M.M. Babu. A Million Peptide Motifs for the Molecular Biologist. *Molecular Cell* 55 (2014) 161–169. <https://doi.org/10.1016/j.molcel.2014.05.032>.

[207] L.J. Stroth, T. Stehle. Glycan Engagement by Viruses: Receptor Switches and Specificity. *Annual Review of Virology* 1 (2014) 285–306. <https://doi.org/10.1146/annurev-viro.031413-085417>.

[208] D.F. Smith, R.D. Cummings. Investigating virus-glycan interactions using glycan microarrays. *Current Opinion in Virology* 7 (2014) 79–87. <https://doi.org/10.1016/j.coviro.2014.05.005>.

[209] S. Shi, N. Pigeonneau, V. Ravikumar, P. Dobrinic, B. Macoň, D. Franjević, M.-F. Noirot-Gros, I. Mijakovic. Cross-phosphorylation of tyrosine/threonine and tyrosine protein kinases on key regulatory residues. *Frontiers in Microbiology* 5 (2014). <https://www.frontiersin.org/articles/10.3389/fmicb.2014.00495> (accessed October 23, 2023).

[210] J. Shi, Y. Wang, L. Zeng, Y. Wu, J. Deng, Q. Zhang, Y. Lin, J. Li, T. Kang, M. Tao, E. Rusinova, Z. Zhang, C. Wang, H. Zhu, J. Yao, Y.-X. Zeng, B.M. Evers, M.-M. Zhou, B.P. Zhou. Disrupting the Interaction of BRD4 with Diacylated Twist Suppresses Tumorigenesis in Basal-like Breast Cancer. *Cancer Cell* 25 (2014) 210–225. <https://doi.org/10.1016/j.ccr.2014.01.028>.

[211] S. Qin, Y. Liu, W. Tempel, M.S. Eram, C. Bian, K. Liu, G. Senisterra, L. Crombet, M. Vedadi, J. Min. Structural basis for histone mimicry and hijacking of host proteins by influenza virus NS1. *Nat Commun* 5 (2014) 3952. <https://doi.org/10.1038/ncomms4952>.

[212] C.P. Pfla, C.-L. Hsieh, Y.-P. Lin, A.S. Matisev, R. Ramani, Y. Sherris, R.E. Oswald, Y.-F. Chang. NMR Solution Structure of the Terminal Immunoglobulin-like Domain from the *Leptospira* Host-Interacting Outer Membrane Protein, LigB. *Biochemistry* 53 (2014) 5249–5260. <https://doi.org/10.1021/bi500669u>.

[213] E.A. Noat, M. Kang, J. Adams, J.L. Van Etten, C.A. Yip. Sirtin-1 Ankyrin Repeat Interacts with Mimicry of Cellular Ubiquitin Ligase Machinery. *Journal of Virology* 88 (2014) 13798–13810. <https://doi.org/10.1128/JVI.01209-14>.

[214] K. Kuntz, W. Zhang, A. Tenger-Tolander, D.H. Palmer, A. Martin, R.D. Reed, S.P. Muller, M.R. Kronfort. Doublets in a mimicry supergene. *Nature* 507 (2014) 229–232. <https://doi.org/10.1038/nature13112>.

[215] A. Katz, L. Solden, S.B. Zou, W. Wiley Navarra, M. Iba. Molecular evolution of protein-RNA mimicry as a mechanism for translational control. *Nucleic Acids Research* 42 (2014) 3261–3271. <https://doi.org/10.1093/nar/gkt1296>.

[216] K.K. Jernigan, S.R. Bordenstein. Ankyrin domains across the Tree of Life. *PeerJ* 2 (2014) e264. <https://doi.org/10.7717/peerj.264>.

[217] T.M. Colussi, D.A. Costantino, J.A. Hammond, G.M. Ruehle, J.C. Xu, J.S. Klett. The structural basis of transfer RNA mimicry and conformational plasticity by a viral RNA. *Nature* 511 (2014) 366–369. <https://doi.org/10.1038/nature13378>.

[218] N. Chutwintongchai, M. Kakisaka, K. Yamada, Y. Aida. Comparative Analysis of Seven Viral Nuclear Export Signals (NESs) Reveals the Crucial Role of Nuclear Export Mediated by the Third NES Consensus Sequence of Nucleoprotein (NP) in Influenza A Virus Replication. *PLOS ONE* 9 (2014) e105081. <https://doi.org/10.1371/journal.pone.0105081>.

[219] F. Carvalho, S. Sousa, D. Cabanes. How *Listeria monocytogenes* organizes its surface for virulence. *Frontiers in Cellular and Infection Microbiology* 4 (2014). <https://www.frontiersin.org/articles/10.3389/fcimb.2014.00048> (accessed October 31, 2023).

[220] J.G. Baum, O.B. Garner, K. Schaefer, B. Lee. Microbe-Host Interactions are Positively and Negatively Regulated by Galectin-Glycan Interactions. *Frontiers in Immunology* 5 (2014). <https://www.frontiersin.org/articles/10.3389/fimmu.2014.00284> (accessed October 31, 2023).

[221] N.C. Barber, L.A. Stark. Engaging with Molecular Form to Understand Function. *LSE* 13 (2014) 21–24. <https://doi.org/10.1187/cebs.13-12-0247>.

[222] J.R. Terman, A. Kashina. Post-translational modification and regulation of actin. *Current Opinion in Cell Biology* 25 (2013) 30–38. <https://doi.org/10.1016/j.cob.2012.10.009>.

[223] S.A. Springer, P. Gagneux. Glycan Evolution in Response to Collaboration, Conflict, and Constraint. *Journal of Biological Chemistry* 288 (2013) 6904–6911. <https://doi.org/10.1074/jbc.R112.424523>.

[224] U. Schaefer, J.S. Y. Ho, R.K. Prinja, A. Tarakhovskiy, The "Histone Mimicry" by Pathogens. *Cold Spring Harb Symp Quant Biol* 78 (2013) 81–90. <https://doi.org/10.1101/sqb.2013.78.020339>.

[225] D. Salomon, K. Orth. What Pathogens Have Taught Us About Posttranslational Modifications. *Cell Host & Microbe* 14 (2013) 269–279. <https://doi.org/10.1016/j.chom.2013.07.008>.

[226] H.D. Rodin, E.A. Durant, J. Mezas. Identifying *Yersinia* Yersinia Targeted Signal Transduction Pathways that Impact Neutrophil Responses during *In Vivo* Murine Infection. *Cell Host & Microbe* 14 (2013) 306–317. <https://doi.org/10.1016/j.chom.2013.08.013>.

[227] K. Mikula, R. Kolodziejczyk, A. Goldman. *Yersinia* infection tools—characterization of structure and function of adhesins. *Frontiers in Cellular and Infection Microbiology* 2 (2013). <https://www.frontiersin.org/articles/10.3389/fcimb.2012.00169> (accessed November 9, 2023).

[228] M. Marin, V.N. Uversky, T. Ott. Intrinsic Disorder in Pathogen Effectors: Protein Flexibility as an Evolutionary Hallmark in the Animal Cell 25 (2013) 3153–3157. <https://doi.org/10.1105/pc.113.116319>.

[229] K. Ireton. Molecular mechanisms of cell-cell spread of intracellular bacterial pathogens. *Open Biol* 3 (2013) 130079. <https://doi.org/10.1098/rsob.130079>.

[230] T. Hayashi, H. Morohashi, M. Hatakeyama. Bacterial EPYVA effectors - Where do they come from? What are they? Where are they going? *Bacterial EPYVA effector family*. *Cellular Microbiology* 15 (2013) 377–385. <https://doi.org/10.1111/cmi.12400>.

[231] U. Gowthaman, V.P. Eswarakumar. Molecular mimicry. *Virulence* 4 (2013) 433–434. <https://doi.org/10.4161/viru.25780>.

[232] N. Drayman, Y. Glick, O. Ben-nun-Shaul, H. Zer, A. Zlotnick, D. Gerber, O. Schuler-Furman, A. Oppenheim. Pathogens Use Structural Mimicry of Native Host Ligands as a Mechanism for Host Receptor Engagement. *Cell Host & Microbe* 14 (2013) 63–73. <https://doi.org/10.1016/j.chom.2013.05.005>.

[233] A.C. Doxey, B.J. McCorkery. Prediction of molecular mimicry candidates in human pathogenic bacteria. *Virulence* 4 (2013) 433–466. <https://doi.org/10.4161/viru.25180>.

[234] L.G. De Masi, C.D. Sturey, J.A. Lieberman, M.S. Donnenberg. Chapter 13 - The type 2 secretion and virulence 4 pilus systems of *Escherichia coli*. In: M.S. Donnenberg (Ed.), *Escherichia Coli* (Second Edition). Academic Press, Boston, 2013. pp. 387–416. <https://doi.org/10.1016/B978-0-12-397048-0.00013-9>.

[235] C. Cousin, A. Derouiche, L. Shi, Y. Pagot, S. Poncet, I. Mijakovic. Protein-serine/threonine/tyrosine kinases in bacterial signaling and regulation. *FEMS Microbiology Letters* 346 (2013) 11–19. <https://doi.org/10.1111/1574-6968.12189>.

[236] T.P. Cid, M.C. Fernandez, S. Benito Martinez, N.L. Jones. Pathogenesis of Helicobacter pylori infection. *Helicobacter* 18 (2013) 12–17. <https://doi.org/10.1111/hel.12076>.

[237] P. Bohmer, S. Szedlaczek, L. Tabernero, A. Ostman, J. den Hertog. Protein tyrosine phosphatase structure-function relationships in regulation and pathogenesis. *The FEBS Journal* 280 (2013) 413–431. <https://doi.org/10.1111/1742-4658.2012.08655.x>.

[238] S. Bardini, J. Corradi, J. Corradi, H. Sawada, S. Backert, H.H. Namani, S. Hailat, RGD Motif Promotes Cell Adhesion: Critical Role of the Helicobacter pylori Type IV Secretion System. *Structure* 21 (2013) 1933–1941. <https://doi.org/10.1016/j.str.2013.08.018>.

[239] L. Zhang, C. Zhang, D. Sun, J. Zhao, X. Lin, L. Li, L. Li, J. Yan. The mammalian cell entry (Mce) protein of pathogenic *Legionella* species is responsible for RGD-motif dependent infection of cells and animals. *Molecular Microbiology* 83 (2012) 1006–1023. <https://doi.org/10.1111/1365-2958.2012.07985.x>.

[240] Y. Zeng, L. Liu, J. He, Y. Liu, C. Zhu, X. You, Y. Wu. Screening and identification of the mimic epitope of the adhesion protein of *Mycoplasma genitalium*. *Can. J. Microbiol.* 58 (2012) 898–908. <https://doi.org/10.1139/wj2012-057>.

[241] S.E. Whitmore, R.J. Lamont. Tyrosine phosphorylation and bacterial virulence. *Int. J. Oral Sci* 4 (2012) 1–6. <https://doi.org/10.1038/isp.2012.6>.

[242] M.-P. Stein, M.P. Müller, A. Wandinger-Ness. Bacterial Pathogens Commandeer Rab GTPases to Establish Intracellular Niche. *Traffic* 13 (2012) 1565–1588. <https://doi.org/10.1111/tra.12000>.

[243] B. Singh, C. Fleury, F. Jalavand, K. Riesbeck. Human pathogens utilize host extracellular matrix proteins laminin and collagen for adhesion and invasion of the host. *FEMS Microbiology Reviews* 36 (2012) 1122–1180. <https://doi.org/10.1111/1574-6976.2012.00340.x>.

[244] C. Serbelle, S. Dupas, E. Perdereau, F. Héroult, C. Dupuy, E. Huguet, J.-M. Drezen. Evolutionary mechanisms driving the evolution of a large polydivergent gene family coding for protein tyrosine phosphatases. *BMC Evol Biol* 12 (2012) 1–9. <https://doi.org/10.1186/1471-2148-12-253>.

[245] J. Pizarro-Carda, A. Kühbacher, P. Cossart. Entry of *Listeria monocytogenes* in Mammalian Epithelial Cells: An Updated View. *Cold Spring Harb Perspect Med* 2 (2012) a010009. <https://doi.org/10.1101/cshperspect.a010009>.

[246] H.D. Penney, C. Hassall, J.H. Skevington, K.R. Abbott, T.N. Sherratt. A comparative analysis of the evolution of imperfect mimicry. *Nature* 483 (2012) 461–464. <https://doi.org/10.1038/nature10961>.

[247] J. Marazzi, J.S.Y. Ho, J. Kim, B. Manicassamy, S. Dewell, R.A. Albrecht, C.W. Seibert, U. Schaefer, K.L. Jeffrey, R.K. Prinja, K. Lee, A. Garcia-Sastre, R.G. Roeder, A. Tarakhovskiy. Suppression of the antiviral response by an influenza histone mimic. *Nature* 483 (2012) 428–433. <https://doi.org/10.1038/nature10892>.

[248] C.R. Hauck, M. Borsova, P. Muenzner. Exploitation of integrin function by pathogenic microbes. *Current Opinion in Cell Biology* 24 (2012) 637–644. <https://doi.org/10.1016/j.cob.2012.07.004>.

[249] C. Grangeasse, S. Nessler, I. Mijakovic. Bacterial tyrosine kinases: evolution, biological function and structural insights. *Philosophical Transactions of the Royal Society B: Biological Sciences* 367 (2012) 2640–2655. <https://doi.org/10.1098/rstb.2011.0424>.

[250] J. Corradi, R. Tegmeyer, M. Wozna, M. Walsbrock, C. Michalek, C. Gagel, T. Cover, R. Frank, H. Sewald, S. Backert, An RGD-Heptapeptide Sequence in CagA of Helicobacter pylori Assists in Interactions with Integrins and Injection of CagA. *Frontiers in Cellular and Infection Microbiology* 2 (2012). <https://www.frontiersin.org/articles/10.3389/fcimb.2012.00070> (accessed October 18, 2023).

[251] T.R. Blower, F.L. Short, D.C. Fairhead, G.P.C. Salmond. Viral motifs above infection and suppresses bacterial virulence to make hosts permissive for replication. *Bacteriophage* 2 (2012) e23030. <https://doi.org/10.4161/bact.23030>.

[252] T.R. Blower, T.J. Evans, R. Przybylski, P.C. Fineran, G.P.C. Salmond. Viral-Encoded Mimicry Enables Infectious Allium. *PLoS Genet* 8 (2012) e1002023. <https://doi.org/10.1371/journal.pgen.1002023>.

[253] H. Bieme, P. Cossart. When bacteria target the nucleus: the emerging family of nucleomodulins. *Bacterial hijacking of the nucleus*. *Cellular Microbiology* 14 (2012) 622–633. <https://doi.org/10.1111/1462-8622.017158.x>.

[254] N. Balasni, C.R. Carlin. Mutual cross-talk between fibronectin integrins and the EGF receptor. *Cell Logist* 2 (2012) 46–51. <https://doi.org/10.1016/j.cll.2011.12.012>.

[255] S. Yamashita, P. Lukaack, T.J. Barnard, N. Noinaj, S. Felek, T.M. Tsang, E.S. Kravonis, B.J. Himebusch, S.K. Buchanan. Structural insights into All-mediated adhesion in *Yersinia pestis*. *Structure* 19 (2011) 1672–1682. <https://doi.org/10.1016/j.str.2011.08.010>.

[256] S. Wessler, M. Gimona, G. Rieder. Regulation of the actin cytoskeleton in Helicobacter pylori-induced migration and invasive growth of gastric epithelial cells. *Cell Communication and Signaling* 9 (2011) 27. <https://doi.org/10.1186/1478-811X-9-27>.

[257] B.M. Ward. The taking of the cytoskeleton one two three: How viruses utilize the cytoskeleton during egress. *Virology* 411 (2011) 244–250. <https://doi.org/10.1016/j.virol.2010.12.024>.

[258] A. Wang, A. Replogle, R. Hussey, T. Baum, X. Wang, E.L. Davis, M.G. Mitchum. Identification of potential host plant mimics of CLAVATA3/ESR (CLE)-like peptides from the plant-parasitic nematode *Heterodera schachtii*: Beet cyst nematode CLEs. *Molecular Plant Pathology* 12 (2011) 177–186. <https://doi.org/10.1111/j.1364-3703.2010.00660.x>.

[259] A. Stern, R. Sorek. The phage-host arms race: Shaping the evolution of microbes. *Bioessays* 33 (2011) 43–51. <https://doi.org/10.1002/bies.210000071>.

[260] A. Ng, R.J. Xavier. Leucine-rich repeat (LRR) proteins: Integrators of pattern recognition and signaling in immunity. *Autophagy* 7 (2011) 1082–1084. <https://doi.org/10.4161/auto.7.9.16464>.

[261] P. Ludin, D. Nilsson, P. Måser. Genome-Wide Identification of Molecular Mimicry Candidates in Parasites. *PLOS ONE* 6 (2011) e17546. <https://doi.org/10.1371/journal.pone.0017546>.

[262] C.A. Lowell. Src-family and Syk Kinases in Activating and Inhibitory Pathways in Innate Immune Cells: Signaling Cross Talk. *Cold Spring Harb Perspect Biol* 3 (2011) a002352. <https://doi.org/10.1101/cshperspect.a002352>.

[263] H.L. Levin, N.V. Moran. Dynamic interactions between transposable elements and their hosts. *Nat Rev Genet* 12 (2011) 615–627. <https://doi.org/10.1038/nrg3030>.

[264] M.M. Krachler, A.R. Woodley, K. Ort. Manipulation of kinase signaling by bacterial pathogens. *Journal of Cell Biology* 195 (2011) 1983–1992. <https://doi.org/10.1083/jcb.201107132>.

[265] B. Henderson, S. Nair, J. Pallas, M.A. Williams. Fibronectin: a multidomain host adhesin targeted by bacterial fibronectin-binding proteins. *FEMS Microbiology Reviews* 35 (2011) 147–200. <https://doi.org/10.1111/j.1574-6976.2010.00243.x>.

[266] M.P. Doddling, M. Way. Coupling viruses to dynein and kinesin-1. *The EMBO Journal* 30 (2011) 3527–3539. <https://doi.org/10.1038/emboj.2011.283>.

[267] N.E. Davey, G. Travé, T.J. Gibson. How viruses hijack cell regulation. *Trends in Biochemical Sciences* 36 (2011) 159–169. <https://doi.org/10.1016/j.tibs.2010.10.002>.

[268] N.F. Brown, B. Finlay. Potential origins and horizontal transfer of type III secretion systems and effectors. *Mobile Genetic Elements* 1 (2011) 118–121. <https://doi.org/10.4161/mge.1.2.16733>.

[269] E. Alix, S. Mukherjee, C.R. Roy. Subversion of membrane transport pathways



[364] S. Leech, *Molecular mimicry in autoimmune disease*, *Archives of Disease in Childhood* 79 (1998) 448–451. <https://doi.org/10.1136/adc.79.5.448>.

[365] M. Joron, J.L.B. Mallet, *Diversity in mimicry: paradox or paradigm?*, *Trends in Ecology & Evolution* 13 (1998) 461–466. [https://doi.org/10.1016/S0169-5347\(98\)01483-9](https://doi.org/10.1016/S0169-5347(98)01483-9).

[366] R. Hooft van Hujsdujnen, *Protein tyrosine phosphatases: counting the trees in the forest*, *Gene* 225 (1998) 1–8. [https://doi.org/10.1016/S0378-1119\(98\)00513-7](https://doi.org/10.1016/S0378-1119(98)00513-7).

[367] A. Darji, D. Bruder, S. zur Lage, B. Gerstel, T. Chakraborty, J. Wehland, S. Weiss, *The Role of the Bacterial Membrane Protein ActA in Immunity and Protection Against Listeria monocytogenes*, *The Journal of Immunology* 161 (1998) 2414–2420. <https://doi.org/10.4049/jimmunol.161.5.2414>.

[368] Y. Tateo, K. Ikeo, T. Imanishi, H. Watanabe, T. Endo, Y. Yamaguchi, K. Takahashi, K. Tsunoyama, M. Kawai, Y. Kawamishi, K. Naitou, T. Gopobori, *Evolutionary motif and its biological and structural significance*, *J Mol Evol* 44 (1997) S38–S43. <https://doi.org/10.1007/PL00000056>.

[369] L.H. Saitman, Y. Lu, E.M. Zaharias, R.R. Isberg, *A Region of the Yersinia pseudotuberculosis Invasin Protein That Contributes to High Affinity Binding to Integrin Receptors*, *Journal of Biological Chemistry* 271 (1996) 23438–23444. <https://doi.org/10.1074/jbc.271.38.23438>.

[370] E. Ruoslahti, *RGD AND OTHER RECOGNITION SEQUENCES FOR INTEGRINS*, *Annu. Rev. Cell Dev. Biol.* 12 (1996) 697–716. <https://doi.org/10.1146/annurev.cellbio.12.1.697>.

[371] J. Mengaud, H. Ohayon, P. Gounon, R.-M. Mège, P. Cossart, *E-Cadherin Is the Receptor for Internalin, a Surface Protein Required for Entry of L. monocytogenes into Epithelial Cells*, *Cell* 84 (1996) 923–932. [https://doi.org/10.1016/S0092-8674\(00\)81070-3](https://doi.org/10.1016/S0092-8674(00)81070-3).

[372] K. Kaniga, J. Uralil, J.B. Bliska, J.E. Galán, *A secreted protein tyrosine phosphatase with modular effector domains in the bacterial pathogen Salmonella typhimurium*, *Molecular Microbiology* 21 (1996) 633–641. <https://doi.org/10.1111/j.1365-2958.1996.tb02571.x>.

[373] S. Pistor, T. Chakraborty, K. Niebuhr, E. Domann, J. Wehland, *The ActA protein of Listeria monocytogenes acts as a nucleator inducing reorganization of the actin cytoskeleton*, *The EMBO Journal* 13 (1994) 758–763. <https://doi.org/10.1002/j.1460-2075.1994.tb06318.x>.

[374] C. Kocks, E. Gouin, M. Tabouret, P. Berche, H. Ohayon, P. Cossart, *L. monocytogenes-induced actin assembly requires the actA gene product, a surface protein*, *Cell* 68 (1992) 521–531. [https://doi.org/10.1016/0092-8674\(92\)90188-4](https://doi.org/10.1016/0092-8674(92)90188-4).

[375] E. a. Groisman, M. h. Salier Jr, H. Ochman, *Horizontal transfer of a phosphatase gene as evidence for mosaic structure of the Salmonella genome*, *The EMBO Journal* 11 (1992) 1309–1316. <https://doi.org/10.1002/j.1460-2075.1992.tb05175.x>.

[376] G. T. Van Nhie, R.R. Isberg, *The Yersinia pseudotuberculosis invasin protein and human fibronectin bind to mutually exclusive sites on the alpha 5 beta 1 integrin receptor*, *Journal of Biological Chemistry* 266 (1991) 24367–24375. [https://doi.org/10.1016/S0021-9258\(18\)54238-1](https://doi.org/10.1016/S0021-9258(18)54238-1).

[377] Y. Kaziro, H. Itoh, T. Kozasa, M. Nakafuku, T. Satoh, *Structure and Function of Signal-Transducing Gtp-Binding Proteins*, *Annual Review of Biochemistry* 60 (1991) 349–400. <https://doi.org/10.1146/annurev.bi.60.070191.002025>.

[378] R.R. Isberg, J.M. Leong, *Cultured mammalian cells attach to the invasin protein of Yersinia pseudotuberculosis*, *Proceedings of the National Academy of Sciences* 85 (1988) 6682–6686. <https://doi.org/10.1073/pnas.85.18.6682>.

[379] C.E. Stebbins, *Modulation of Host Signaling by a Bacterial Mimic: Structure of the Salmonella Effector SptP Bound to Rac*, *Molecular Cell* (n.d.).
